# Supplementary material
Source: publisher figshare collection journal article supplement (https://frontiersin.figshare.com/ndownloader/files/28447926)
Supplement: Supplementary file 1 [file 28447926]

## Sheet: One way to show it
	Paleosol 5	Paleosol 4	Paleosol 3	Paleosol 2	Paleosol 1	Modern Soil
Original Magnetization	0.00426922	0.00252436	0.00211217	0.00107004	0.00206358	0.00466621
"Enhanced" Magnetization	0.00418084	0.00251672	0.00214798	0.00112561	0.00207737	0.00457668
Magnetization after AF demagnetization (1000 mT)	0.000631439	0.000439663	0.000552196	0.000224522	0.000327979	0.000556895
Final Magnetization after AF demagnetization (1000 mT) and Thermal demagnetization (400 K)	0.000502334	0.000334522	0.000416081	0.000152122	0.000234353	0.000416865
Percentage of "Enhanced" Magnetization lost after AF demagnetization (1000 mT)	0.848968	0.825304	0.742924	0.800532	0.842118	0.878319
Percentage of "Enhanced" Magnetization lost after AF and Thermal demagnetization	0.879849	0.86708	0.806292	0.864854	0.887188	0.908916

## Sheet: Like this way better
Table 1a: Room Temperature (300 K) Magnetization Values from the Low-Temperature Hematite-Goethite Test
	Paleosol 5	Paleosol 4	Paleosol 3	Paleosol 2	Paleosol 1	Modern Soil
Original Magnetization	0.00426922	0.00252436	0.00211217	0.00107004	0.00206358	0.00466621
"Enhanced" Magnetization	0.00418084	0.00251672	0.00214798	0.00112561	0.00207737	0.00457668
Magnetization after AF demagnetization (1000 mT)	0.000631439	0.000439663	0.000552196	0.000224522	0.000327979	0.000556895
Final Magnetization after AF demagnetization (1000 mT) and Thermal demagnetization (400 K)	0.000502334	0.000334522	0.000416081	0.000152122	0.000234353	0.000416865
Table 1b: Calculating Relative Contribution of Each Mineral to Bulk Magnetization
"Hematite + Goethite" Percentage	0.151032	0.174696	0.257076	0.199468	0.157882	0.121681
"Hematite" Percentage	0.120151	0.13292	0.193708	0.135146	0.112812	0.0910845
"Goethite" Percentage	0.0308801	0.0417769	0.0633685	0.064321	0.0450695	0.0305964
"Magnetite/maghemite" Percentage	0.848968	0.825304	0.742924	0.800532	0.842118	0.878319
Table 1a describes the actual values calculated from the Low-temperature hematite goethite test while Table 1b are cacluated values, caution is stressed when interpreting the values of Table 1b, nevertheless they are useful for rough approximations
